# Supplementary material for: A straightforward chemical approach for excellent In2S3 electron transport layer for high-efficiency perovskite solar cells
Source: Royal Society of Chemistry journal article supplement (doi:10.1039/c8ra08940j), 2019-01-01
Supplement: c8ra08940j1.pdf [file c8ra08940j1.pdf]

## A Straightforward Chemical Approach for Superb In<sub>2</sub>S<sub>3</sub> Electron Transport Layer applied in Hybrid Perovskite Solar Cells

Fengyang Yu <sup>a</sup>, Wangen Zhao <sup>a\*</sup>, Shengzhong (Frank) Liu <sup>a,b\*</sup>

a. Key Laboratory for Applied Surface and Colloid Chemistry, Ministry of Education; Shaanxi Engineering Lab for Advanced Energy Technology; School of Materials Science and Engineering, Shaanxi Normal University, Xi'an 710062, China.

b. Dalian Institute of Chemical Physics, Dalian National Laboratory for Clean Energy, Chinese Academy of Sciences, Dalian, 116023, China.

Tel & Fax: (180) 9186-3826; Email: [wgzhao@snnu.edu.cn](mailto:wgzhao@snnu.edu.cn); [Liusz@snnu.edu.cn](mailto:Liusz@snnu.edu.cn)

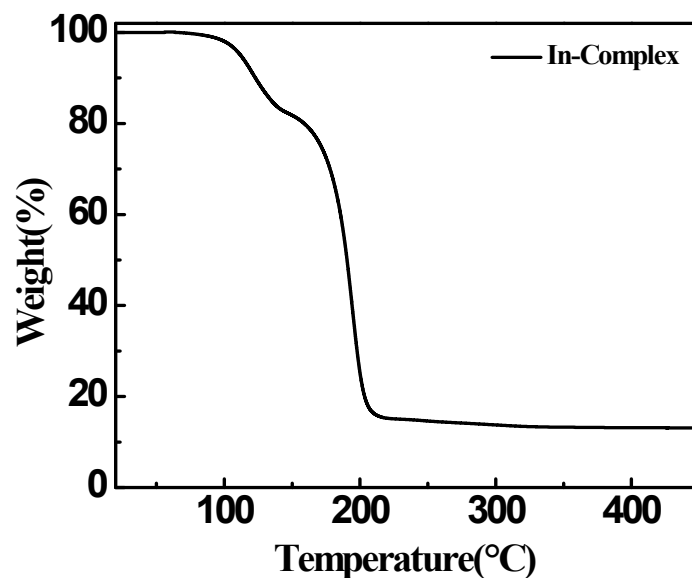

**Figure S1.** Thermogravimetric (TG) analysis curves of In-complex powder.

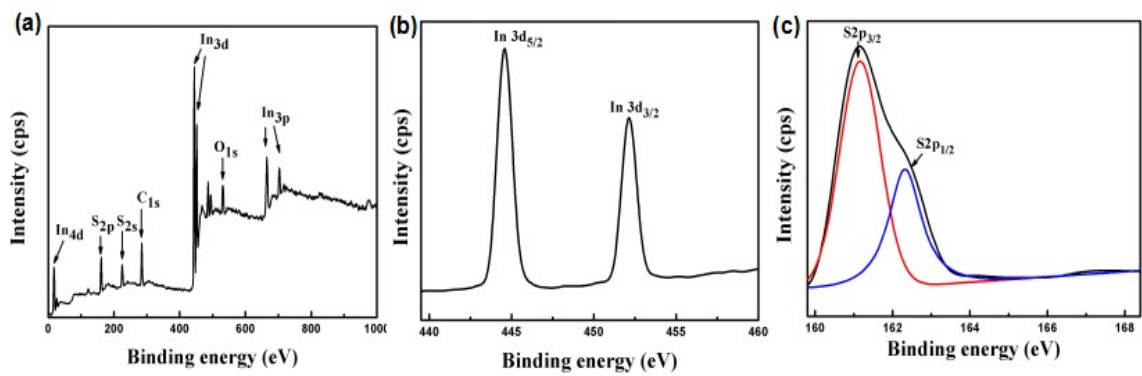

**Figure S2.** (a) the surface-sensitive XPS (X-ray photoelectron spectroscopy), (b)  $\text{In}_{3d}$  peaks and (c)  $\text{S}_{2p}$  peaks of  $\text{In}_2\text{S}_3$  films.

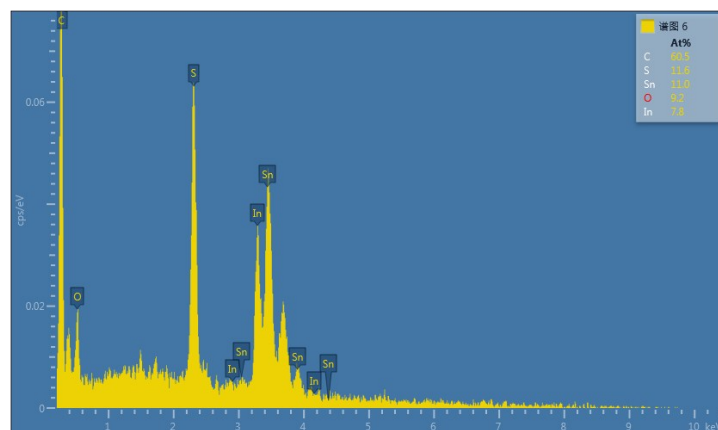

**Figure S3.** The SEM-EDS image of  $\text{In}_2\text{S}_3$  films.

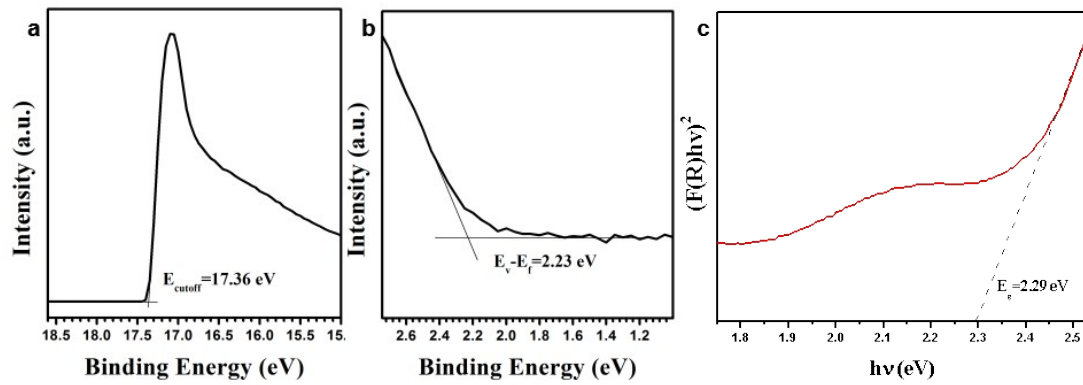

**Figure S4.** Ultraviolet photoelectron spectra illustrating (a) the secondary electron emission cut-off ( $E_{\text{cut-off}}$ ) and (b) valence band maximum (VBM) of  $\text{In}_2\text{S}_3$  thin film. (c) Tauc plot for evaluating the optical bandgap of  $\text{In}_2\text{S}_3$  film.

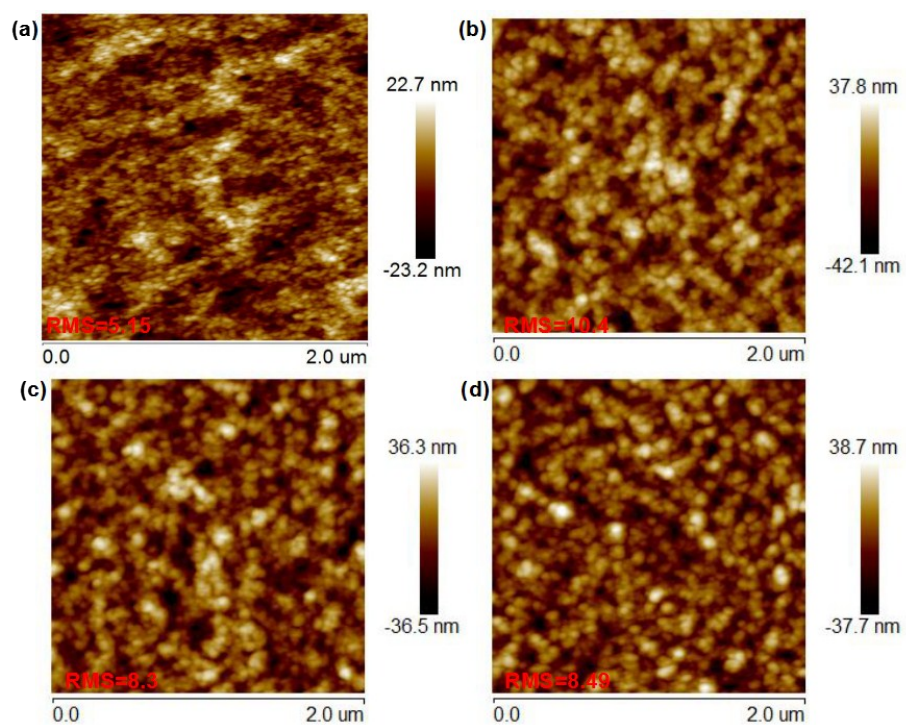

**Figure S5.** AFM height images for 220 mmol/L(a); 110 mmol/L(b); 75 mmol/L(c) and 50 mmol/L(d) In-complex precursor processed  $\text{In}_2\text{S}_3$  films.

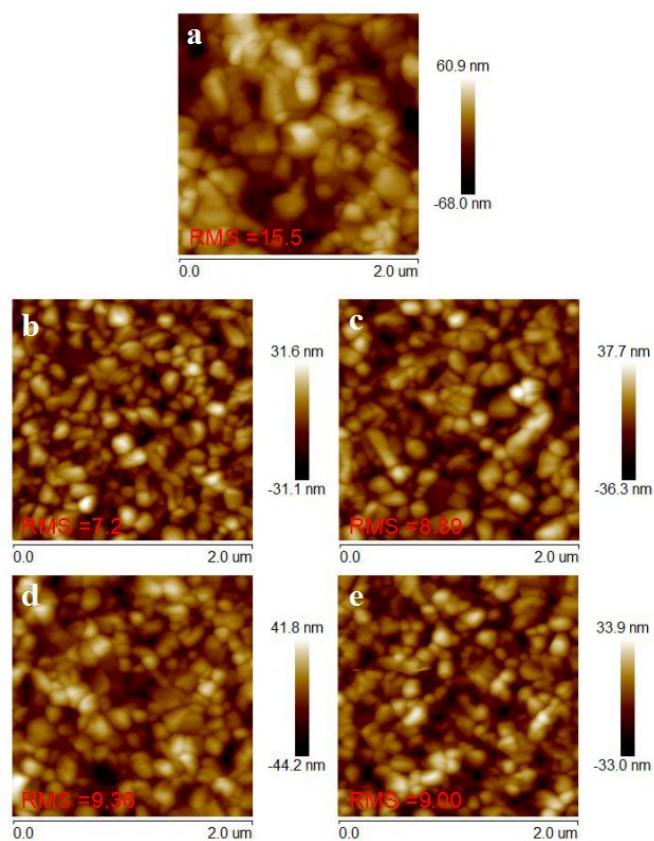

**Figure S6.** AFM height images for perovskite films based on 220 mmol/L(a); 110 mmol/L(b); 75 mmol/L(c) and 50 mmol/L(d)In-complex precursor processed  $\text{In}_2\text{S}_3$  ETLs.

Table S1. The thickness of  $\text{In}_2\text{S}_3$  film deposited with different metal concentration.

| Concentration | 220 mmol/L | 110 mmol/L | 75 mmol/L | 50 mmol/L |
|---------------|------------|------------|-----------|-----------|
| Thickness(nm) | 99.4       | 43.9       | 24.6      | 17.5      |

**Table S1.** Influence of the concentration of  $\text{In}_2\text{S}_3$  precursor photovoltaic parameters of the best PSC devices.

| Concentration | $J_{SC}$ (mA/cm <sup>2</sup> ) | $V_{OC}$ (V) | $FF$ (%) | $PCE$ (%) |
|---------------|--------------------------------|--------------|----------|-----------|
| 220 mmol/L    | 20.15                          | 1.05         | 65.93    | 13.99     |
| 110 mmol/L    | 20.78                          | 1.05         | 65.39    | 14.33     |
| 75 mmol/L     | 21.00                          | 1.06         | 69.53    | 15.48     |
| 50 mmol/L     | 21.03                          | 1.03         | 57.61    | 12.54     |

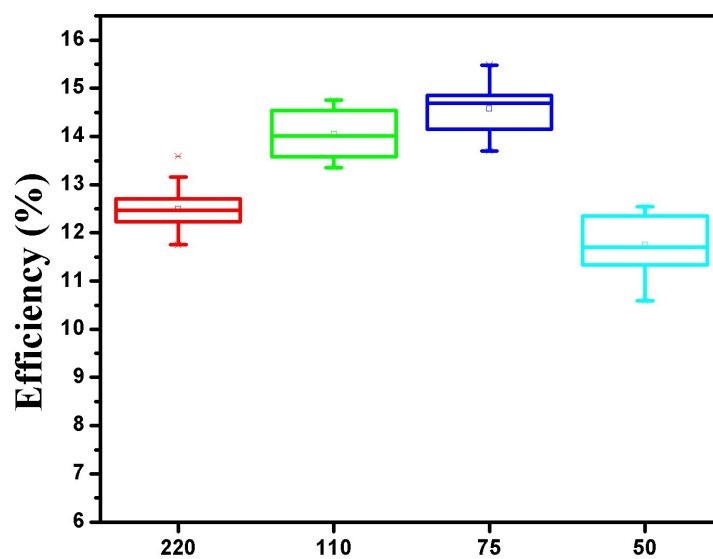

**Figure S7.** PCE distribution of PSCs based on different concentration (mmol/L)  $\text{In}_2\text{S}_3$  ETLs. All the devices were measured under AM 1.5 G solar irradiation.

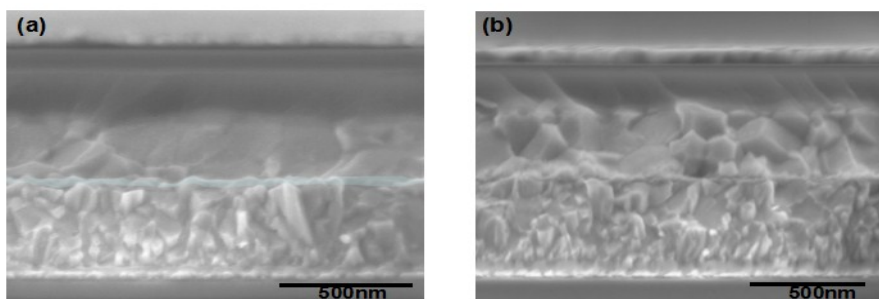

**Figure S8.** Cross-sectional SEM image of the perovskite devices based on In<sub>2</sub>S<sub>3</sub> (left) and TiO<sub>2</sub> (right).

The cross-sectional SEM images of the complete cells are displayed in Figure S8. The thickness of the CH<sub>3</sub>NH<sub>3</sub>PbI<sub>3</sub> film is about 350 nm, based on the In<sub>2</sub>S<sub>3</sub>, the perovskite film has a better crystallinity.
